# Supplementary material for: MoS2 nanoparticle/activated carbon composite as a dual-band material for absorbing microwaves
Source: Royal Society of Chemistry journal article supplement (doi:10.1039/d1na00292a), 2021-01-01
Supplement: d1na00292a1.pdf [file d1na00292a1.pdf]

## Electronic Supplementary Information

# MoS<sub>2</sub> nanoparticles/Activated carbon composite as a dual-band microwave absorbing material

Praveen Negi, Ashavani Kumar

Department of Physics, National Institute of Technology Kurukshetra, Haryana 136119, India

*Email:* [ashavani@yahoo.com](mailto:ashavani@yahoo.com), [ashavani@nitkkr.ac.in](mailto:ashavani@nitkkr.ac.in)

**Supporting information**

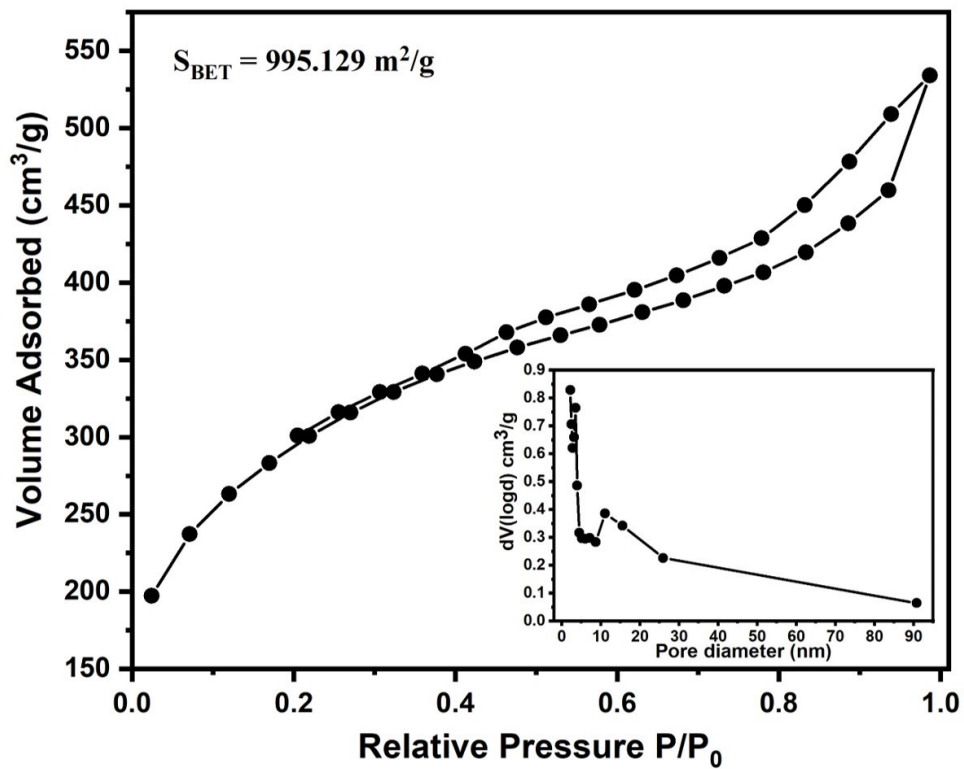

**Fig. S1.** Nitrogen adsorption-desorption isotherm and pore size distribution (inset Figure) of AC.

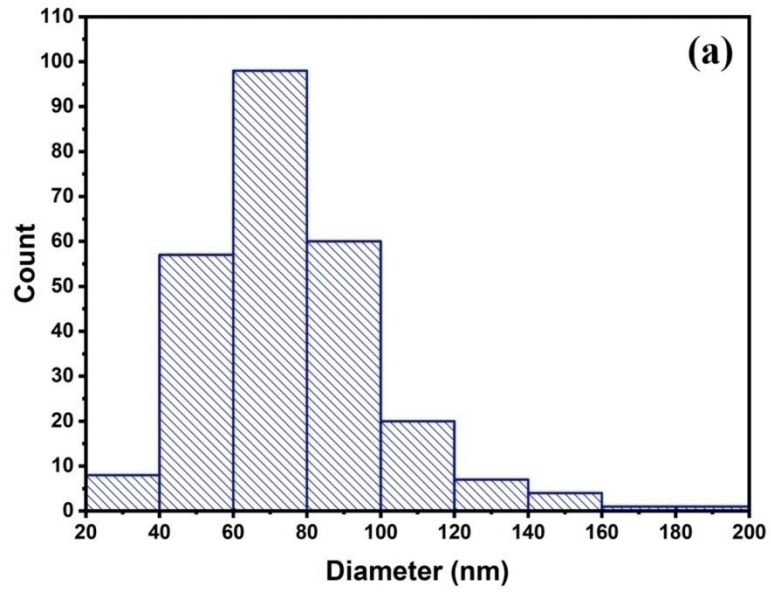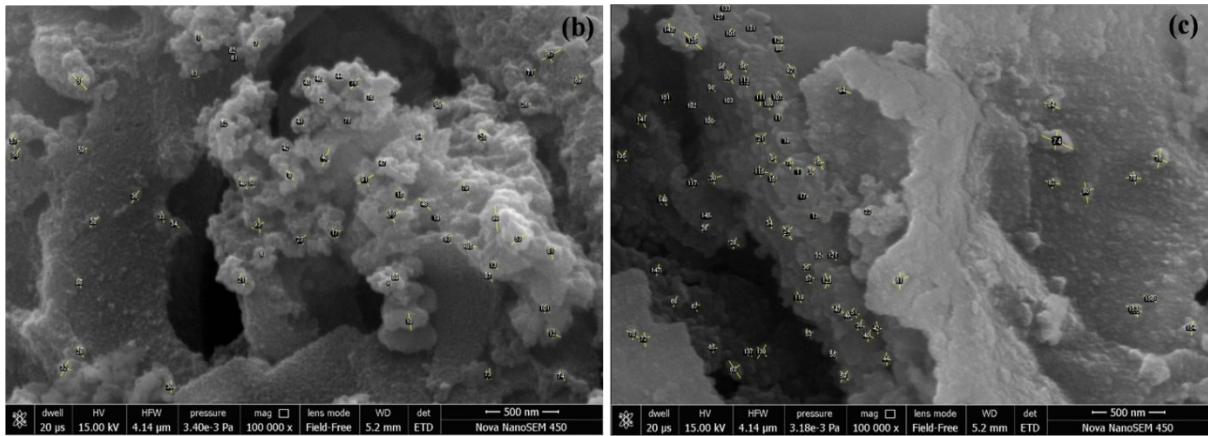

**Fig. S2.** (a)  $\text{MoS}_2$  particle size distribution in MAC using FESEM image (b) and (c).

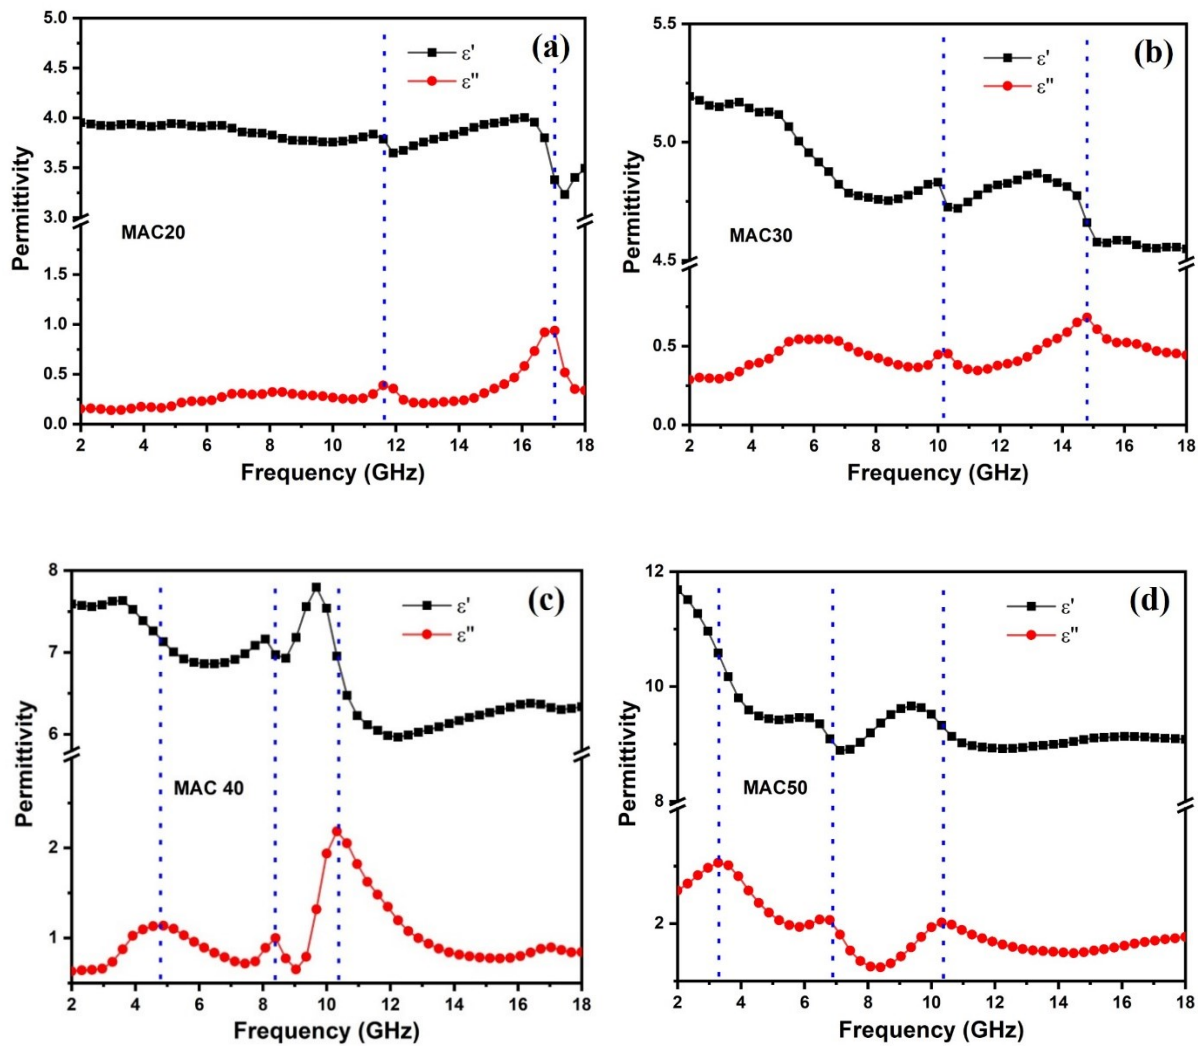

Fig. S3. Complex permittivity of (a) MAC20, (b) MAC30, (c) MAC40 and (d) MAC50.

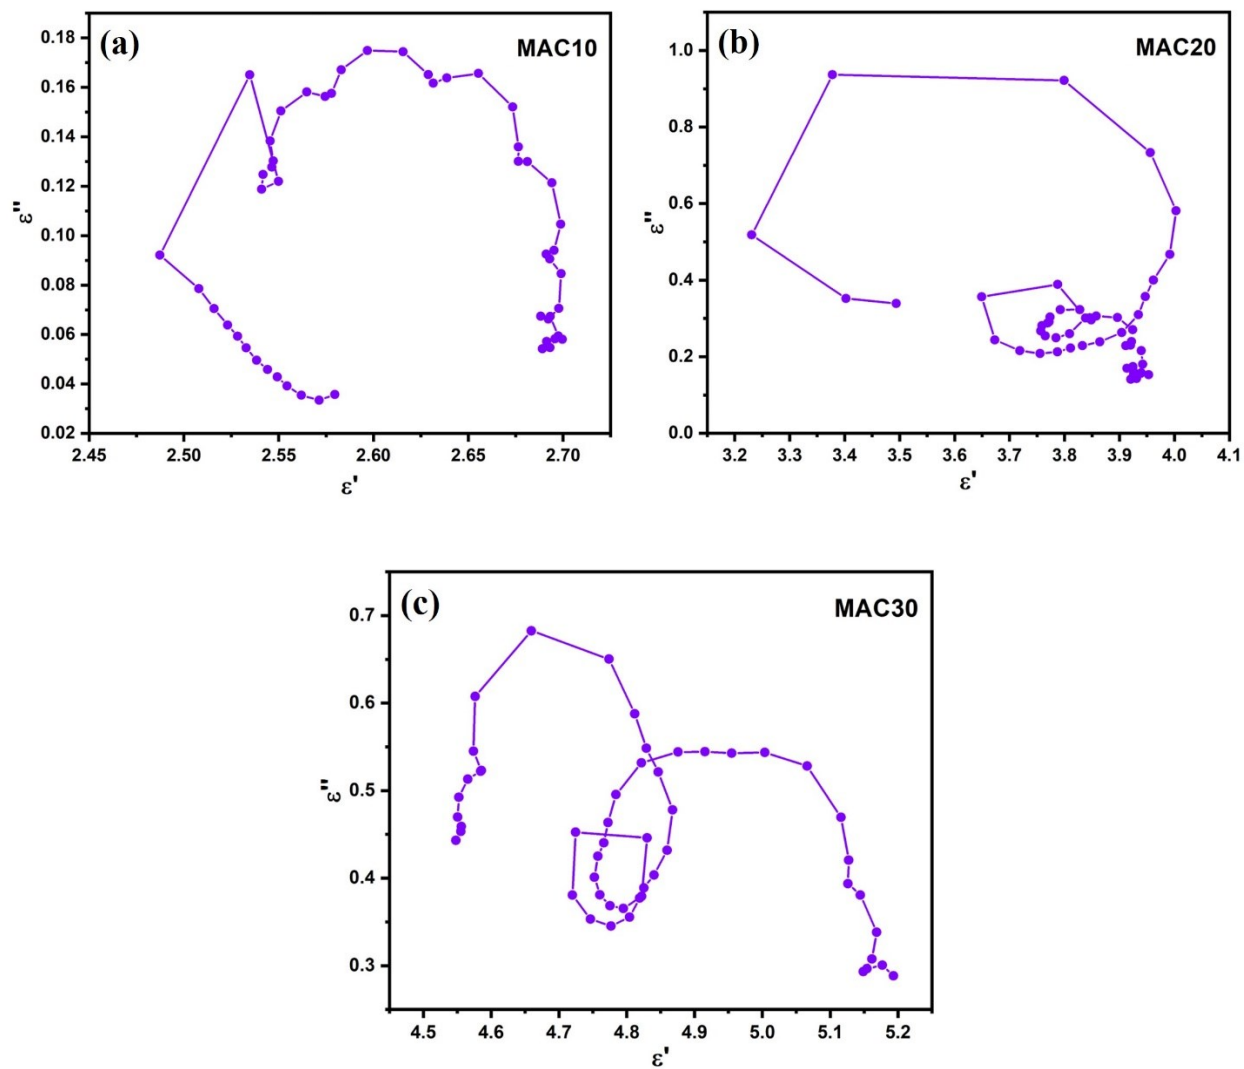

**Fig. S4.** Cole-Cole plot of (a) MAC10, (b) MAC20 and (c) MAC30.

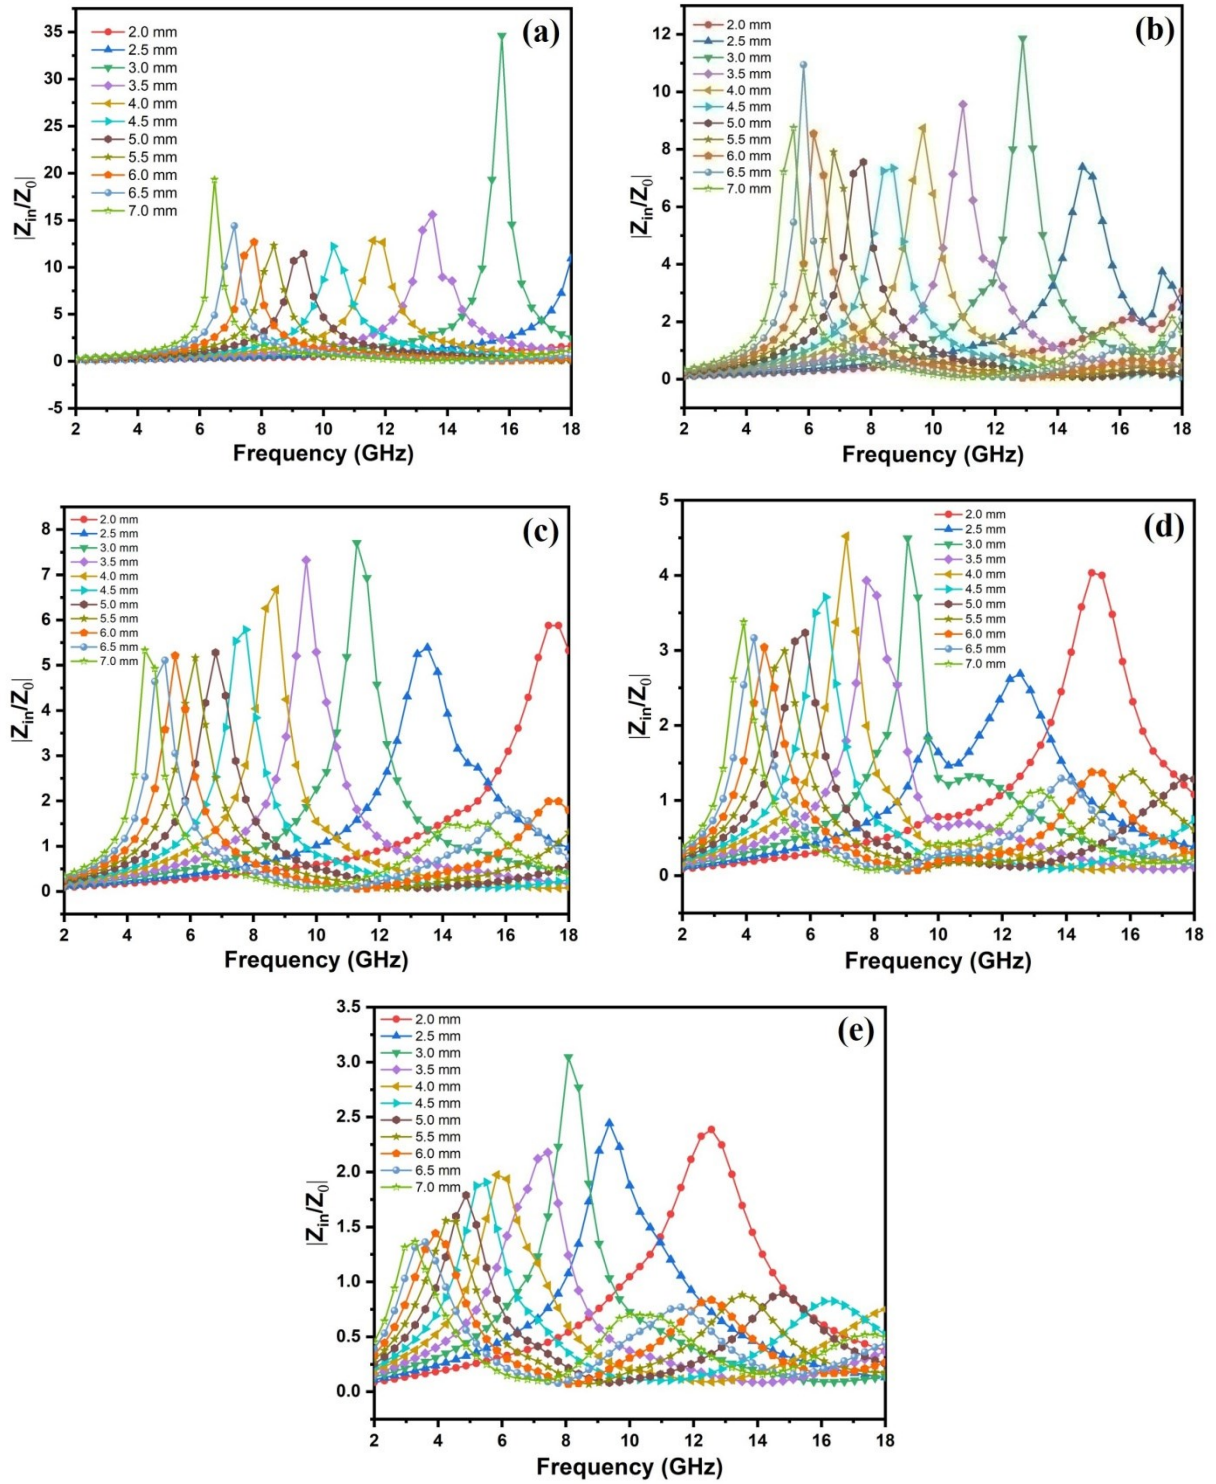

**Fig. S5.** Relation between  $|Z_{in}/Z_0|$  and frequency for (a) MAC10, (b) MAC20, (c) MAC30, (d) MAC40 and (e) MAC50 at thicknesses ranging from 2 mm to 7 mm.

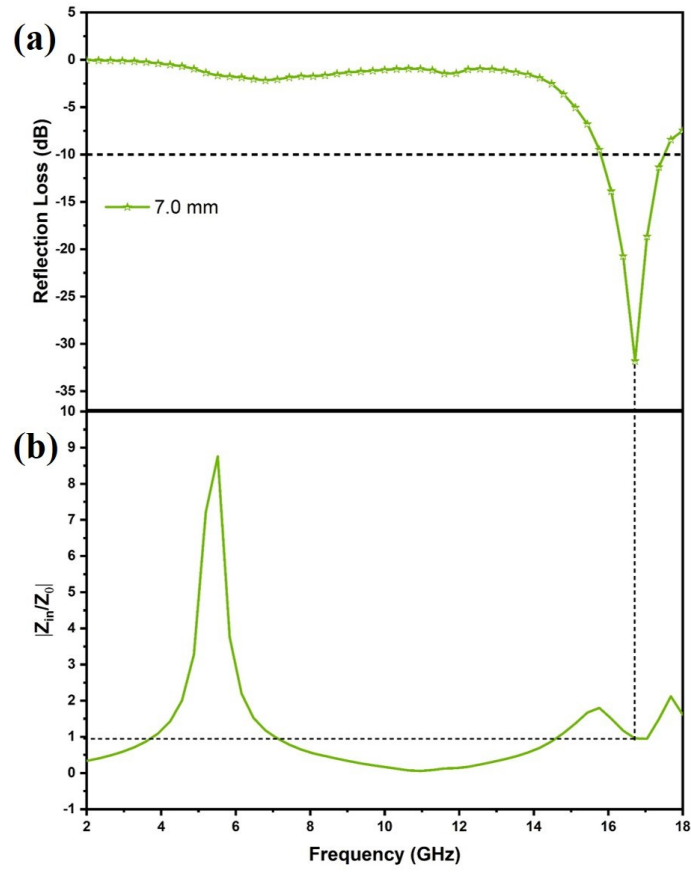

**Fig. S6.** (a) The RL-Frequency curves at 7 mm thickness and (b) Relationship between  $|Z_{in}/Z_o|$  and peak frequency for MAC20.

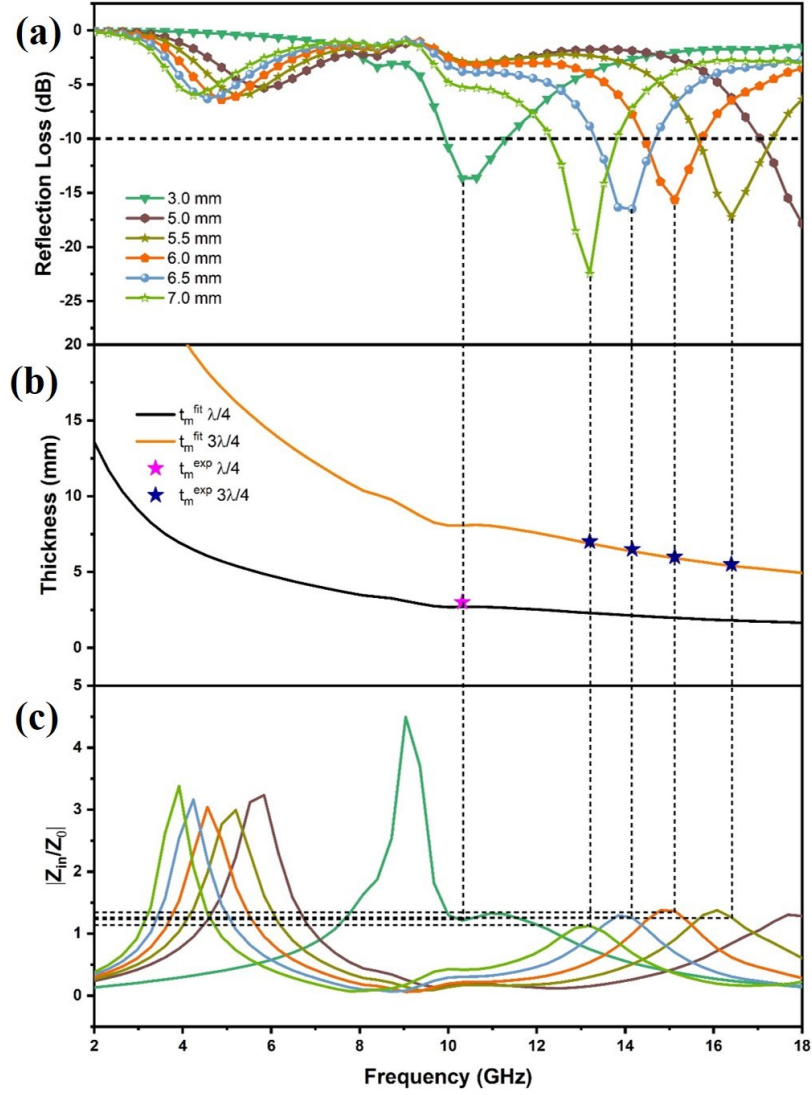

**Fig. S7.** (a) The RL-Frequency curves of MAC40 with absorber thickness from 3 mm to 7 mm; (b) Relationship between  $t_m^{fit}$ ,  $t_m^{exp}$  and peak frequency of MAC40 under  $n\lambda/4$  model and (c) The relationship between  $|Z_{in}/Z_o|$  and frequency for MAC40.
